# Supplementary material
Source: HighWire-hosted journal article supplement (https://bmjopen.bmj.com/content/7/9/e018283)
Supplement: inline-supplementary-material-1 [file inline-supplementary-material-1.pdf]

Supplementary Table S1: Prevalence of skin conditions

| <b>Skin conditions and diseases (ICD-10)</b> | <b>Prevalence (% , 95% CI)</b>  |
|----------------------------------------------|---------------------------------|
| Xerosis cutis (L85.3) ODS >0                 | 221/223 (99.1%, 97.7% - 100.0%) |
| Xerosis cutis (L85.3) ODS >1                 | 186/223 (83.4%, 78.0% - 88.2%)  |
| Xerosis cutis (L85.3) ODS >2                 | 85/223 (38.1%, 31.7% - 44.5%)   |
| Xerosis cutis (L85.3) ODS >3                 | 24/223 (10.8%, 6.7% - 14.8%)    |
| Tinea unguium (B35.1)                        | 139/223 (62.3%, 56.0% - 69.1%)  |
| Seborrheic keratosis (L82)                   | 126/223 (56.5%, 50.2% - 63.0%)  |
| Androgenetic alopecia (L64.9)                | 112/223 (50.2%, 43.8% - 57.5%)  |
| Incontinence associated dermatitis           | 79/223 (35.4%, 29.9% - 42.2%)   |
| Tinea pedis (B35.3)                          | 71/223 (31.8%, 25.8% - 38.1%)   |
| Other pigmentation disorders (L81.-)         | 57/223 (25.6%, 20.4% - 31.5%)   |
| Venous insufficiency (I87.2)                 | 50/223 (22.4%, 17.0% - 27.6%)   |
| Actinic keratosis (L57.0)                    | 47/223 (21.1%, 16.2% - 26.5%)   |
| Scar and fibrosis (L90.5)                    | 39/223 (17.5%, 12.5% - 22.7%)   |
| Seborrheic dermatitis (L21.-)                | 37/223 (16.6%, 11.8% - 21.6%)   |
| Intertrigo (L30.4)                           | 36/223 (16.1%, 11.6% - 21.2%)   |
| Haemangioma (D18.0)                          | 32/223 (14.3%, 9.9% - 19.1%)    |
| Melanocytic naevi (D22.9)                    | 29/223 (13.0%, 8.5% - 17.3%)    |
| Haemorrhage (R23.3)                          | 29/223 (13.0%, 8.9% - 17.5%)    |
| Rosacea (L71.9)                              | 28/223 (12.6%, 8.5% - 17.0%)    |
| Pressure ulcer (L89.-, all categories)       | 20/223 (9.0%, 5.0% - 13.0%)     |
| Neoplasm (C44.9)                             | 18/223 (8.1%, 4.5% - 12.2%)     |
| Pruritus (L29.9)                             | 17/223 (7.6%, 4.1% - 11.1%)     |
| Acrochordon. (L91.8)                         | 14/223 (6.3%, 3.1% - 9.8%)      |
| Stasis dermatitis (I83.1)                    | 14/223 (6.3%, 3.2% - 9.9%)      |
| Skin tears                                   | 14/223 (6.3%, 3.2% - 9.5%)      |
| Superficial injury open wounds (S00 to S99)  | 13/223 (5.8%, 2.7% - 9.3%)      |
| Follicular cysts (L72.9)                     | 11/223 (4.9%, 2.2% - 7.7%)      |
| Corn and callosities (L84)                   | 9/223 (4.0%, 1.8% - 6.8%)       |
| Irritant contact dermatitis (L24.9)          | 8/223 (3.6%, 1.3% - 6.3%)       |
| Folliculitis (L73.9)                         | 8/223 (3.6%, 1.4% - 6.3%)       |
| Contact dermatitis (L25.9)                   | 7/223 (3.1%, 0.9% - 5.8%)       |
| Candidiasis (B37.9)                          | 6/223 (2.7%, 0.9% - 4.9%)       |
| Cheilitis angularis (K13.0)                  | 6/223 (2.7%, 0.9% - 5.0%)       |
| Hypertrichosis (L68.9)                       | 5/223 (2.2%, 0.4% - 4.5%)       |
| Erythrasma (L08.1)                           | 5/223 (2.2%, 0.4% - 4.1%)       |
| Bowen disease (D04.9)                        | 5/223 (2.2%, 0.5% - 4.4%)       |
| Psoriasis (L40.)                             | 4/223 (1.8%, 0.4% - 3.6%)       |
| Fibroma (D21.9)                              | 4/223 (1.8%, 0.4% - 4.0%)       |
| Cicatricial alopecia (L66)                   | 3/223 (1.3%, 0.0% - 3.1%)       |
| Allergic contact dermatitis (L23.9)          | 2/223 (0.9%, 0.0% - 2.3%)       |
| Alopecia areata (L63.-)                      | 2/223 (0.9%, 0.0% - 2.3%)       |
| Ectropium (H02.1)                            | 2/223 (0.9%, 0.0% - 2.3%)       |
| Cornu cutaneum (L85.8)                       | 2/223 (0.9%, 0.0% - 2.3%)       |
| Hyperhidrosis (R61.9)                        | 2/223 (0.9%, 0.0% - 2.2%)       |
| Aphta, mucosal (K12.0)                       | 2/223 (0.9%, 0.0% - 2.2%)       |
| Cellulitis (L03.9)                           | 1/223 (0.4%, 0.0% - 1.4%)       |
| Atopic dermatitis (L20.9)                    | 1/223 (0.4%, 0.0% - 1.4%)       |
| Lichen simplex chronicus and prurigo (L28.-) | 1/223 (0.4%, 0.0% - 1.4%)       |
| Vitiligo (L80)                               | 1/223 (0.4%, 0.0% - 1.4%)       |
| Atrophic disorders (L90.9)                   | 1/223 (0.4%, 0.0% - 1.4%)       |
| Granulomatous disorders (L92.9)              | 1/223 (0.4%, 0.0% - 1.4%)       |
| Tinea corporis (B35.4)                       | 1/223 (0.4%, 0.0% - 1.4%)       |
| Varicosis (I83.9)                            | 1/223 (0.4%, 0.0% - 1.4%)       |
| Verruca (B07)                                | 1/223 (0.4%, 0.0% - 1.4%)       |
| Comedo (L70.0)                               | 1/223 (0.4%, 0.0% - 1.4%)       |

|                                 |                           |
|---------------------------------|---------------------------|
| Ichthyosis (L85.0)              | 1/223 (0.4%, 0.0% - 1.4%) |
| Ulcus cruris (L97)              | 1/223 (0.4%, 0.0% - 1.4%) |
| Dermatitis nummularis (L30.0)   | 1/223 (0.4%, 0.0% - 1.4%) |
| Ecthyma (L08.0)                 | 1/223 (0.4%, 0.0% - 1.4%) |
| Pityriasis versicolor (B36.0)   | 1/223 (0.4%, 0.0% - 1.4%) |
| Lentigo maligna (D03.9)         | 1/223 (0.4%, 0.0% - 1.4%) |
| Abrasion (T14.01)               | 1/223 (0.4%, 0.0% - 1.4%) |
| Diabetic foot syndrome (E13.74) | 1/223 (0.4%, 0.0% - 1.4%) |

CI: confidence interval; ICD: international code of diseases

Supplementary Table S2: Logistic regression, dependent variable: Tinea pedis (B35.3)

| Independent variable          | Standardized Beta coefficient | Standard error | Wald statistic | OR (95% CI)            | P value | VIF | Nagelkerke R <sup>2</sup> |
|-------------------------------|-------------------------------|----------------|----------------|------------------------|---------|-----|---------------------------|
| Gender (0 = male, 1 = female) | -0.672                        | 0.312          | 4.644          | 0.511 (0.277 to 0.941) | 0.031   | 1.0 | 0.116                     |
| Barthel-Index                 | 0.012                         | 0.007          | 3.254          | 1.012 (0.999 to 1.025) | 0.062   | 1.0 |                           |
| Duration of residency         | -0.011                        | 0.004          | 5.904          | 0.989 (0.980 to 0.998) | 0.015   | 1.0 |                           |
| Constant                      | 0.206                         | 0.626          | 0.108          | 1.228                  | 0.742   | -   |                           |

VIF: Variance inflation factor

Supplementary Table S3: Logistic regression, dependent variable: Venous insufficiency (I87.2)

| Independent variable       | Standardized Beta coefficient | Standard error | Wald statistic | OR (95% CI)            | P value | VIF | Nagelkerke R <sup>2</sup> |
|----------------------------|-------------------------------|----------------|----------------|------------------------|---------|-----|---------------------------|
| Barthel-Index              | 0.019                         | 0.007          | 6.586          | 1.019 (1.004 to 1.033) | 0.010   | 1.0 | 0.078                     |
| Number of medications used | 0.105                         | 0.048          | 4.718          | 1.110 (1.010 to 1.220) | 0.030   | 1.0 |                           |
| Constant                   | -2.888                        | 0.554          | 27.169         | 0.056                  | <0.001  | -   |                           |

VIF: Variance inflation factor
